# Supplementary material
Source: PubMed Central journal article supplement (PMC7458671)
Supplement: NIHMS1619757-supplement-supplement.pdf [file NIHMS1619757-supplement-supplement.pdf]

## Supplementary Appendix

This appendix has been provided by the authors to give readers additional information about their work.

Supplement to: Modi S, Saura C, Yamashita T, et al. Trastuzumab deruxtecan in previously treated HER2-positive breast cancer. *N Engl J Med* 2020;382:610-21. DOI: 10.1056/NEJMoa1914510

## Table of Contents

|                                                                                                                                            |           |
|--------------------------------------------------------------------------------------------------------------------------------------------|-----------|
| <b>List of Investigators</b> .....                                                                                                         | <b>2</b>  |
| <b>Inclusion Criteria</b> .....                                                                                                            | <b>5</b>  |
| <b>Exclusion Criteria</b> .....                                                                                                            | <b>5</b>  |
| <b>Safety Assessment</b> .....                                                                                                             | <b>6</b>  |
| <b>Interstitial Lung Disease</b> .....                                                                                                     | <b>6</b>  |
| <b>Supplementary Tables and Figures</b> .....                                                                                              | <b>8</b>  |
| <b>Supplementary Table S1. Patient Demographics and Baseline Characteristics for Both Parts 1 and 2</b>                                    | <b>8</b>  |
| <b>Supplementary Table S2. Efficacy by Independent Central Review in Patients in Part 1</b> .....                                          | <b>10</b> |
| <b>Supplementary Table S3. Overall Safety of T-DXd in Patients Treated at the RP2D (5.4 mg/kg)</b> .....                                   | <b>11</b> |
| <b>Supplementary Table S4. Treatment-Emergent Adverse Events in &gt;10% of All Enrolled Patients</b> .....                                 | <b>12</b> |
| <b>Supplementary Table S5. Treatment-Emergent Adverse Events in &gt;10% of Patients Treated at the RP2D, Regardless of Causality</b> ..... | <b>14</b> |
| <b>Supplementary Table S6. Updated Guidelines for the Management of Trastuzumab Deruxtecan-Induced Interstitial Lung Disease</b> .....     | <b>17</b> |
| <b>Supplementary Figure S1. Study Design</b> .....                                                                                         | <b>19</b> |
| <b>Supplementary Figure S2. Overall survival</b> .....                                                                                     | <b>20</b> |
| <b>References</b> .....                                                                                                                    | <b>21</b> |

## List of Investigators

| Country<br>Study Site                                                   | Principal Investigator     |
|-------------------------------------------------------------------------|----------------------------|
| <b>Belgium</b>                                                          |                            |
| UZ Leuven                                                               | Hans Wildiers              |
| Grand Hôpital de Charleroi                                              | Jean-Luc Canon             |
| CHU Sart Tilman                                                         | Guy Jerusalem              |
| Imeldaziekenhuis                                                        | Wim W. Wynendaele          |
| AZ Sint-Maarten                                                         | Jill Wagemans              |
| <b>France</b>                                                           |                            |
| Hôpital Saint-Louis – Paris                                             | Luis Teixeira              |
| Institut Régional du Cancer de Montpellier                              | William Jacot              |
| Hôpital Nord- CHU Marseille                                             | Marjorie Baciuchka-Palmaro |
| Centre Hospitalier Lyon Sud                                             | You Benoit                 |
| Institut Gustave Roussy                                                 | Fabrice Andre              |
| CRLCC Eugene Marquis                                                    | Christophe Perrin          |
| CH de la Rochelle – Hopital St Louis                                    | Claire Jamet               |
| CHU Besançon – Hôpital Jean Minjot                                      | Elsa Curtit                |
| Institut Sainte Catherine                                               | Julien Grenier             |
| <b>Italy</b>                                                            |                            |
| Azienda Socio Sanitaria Territoriale di Monza<br>(Presidio San Gerardo) | Marina Cazzaniga           |
| Ospedal San Raffaele                                                    | Luca Gianni                |
| IEO Istituto Europeo di Oncologia                                       | Giuseppe Curigliano        |
| Fondazione IRCCS Istituto Nazionale dei<br>Tumori                       | Giulia Bianchi             |
| <b>Japan</b>                                                            |                            |
| National Cancer Center Hospital East                                    | Toru Mukohara              |
| National Cancer Center Hospital                                         | Kenji Tamura               |
| Cancer Institute Hospital of JFCR                                       | Yoshinori Ito              |
| Aichi Cancer Center Hospital                                            | Hiroji Iwata               |
| Kindai University Hospital                                              | Tsutomu Iwasa              |
| Hakuaikai Sagara Hospital                                               | Yasuaki Sagara             |
| Toranomon Hospital                                                      | Toshimi Takano             |
| Kanagawa Cancer Center                                                  | Toshinari Yamashita        |
| NHO Shikoku Cancer Center                                               | Kenjiro Aogi               |
| NHO Kyushu Cancer Center                                                | Eriko Tokunaga             |
| St. Luke's International Hospital                                       | Naoki Hayashi              |
| <b>Republic of Korea</b>                                                |                            |
| Seoul National University Hospital                                      | Seock-ah Im                |
| Samsung Medical Center                                                  | Yeon Hee Park              |
| Seoul National University Bundang Hospital                              | Jee Hyun Kim               |
| Asan Medical Center                                                     | Sung-Bae Kim               |
| Severance Hospital, Yonsei University                                   | Joo Hyuk Sohn              |

|                                                                             |                            |
|-----------------------------------------------------------------------------|----------------------------|
| National Cancer Center                                                      | Keun Seok Lee              |
| Korea University Anam Hospital                                              | Kyong Hwa Park             |
| Kyungpook National University Chilgok Hospital                              | Yee Soo Chae               |
| <b>Spain</b>                                                                |                            |
| Hospital Universitario Virgen del Rocio                                     | Manuel Ruiz-Borrego        |
| Hospital Universitari Dexeus                                                | Xavier Gonzalez Farre      |
| Hospital Infanta Cristina                                                   | Ignacio Delgado Mingorance |
| Hospital Quironsalud Barcelona                                              | Jose Manuel Perez Garcia   |
| Hospital Universitari Vall d'Hebron                                         | Cristina Saura             |
| Hospital Universitario Ramon y Cajal                                        | Maria Fernandez Abad       |
| ICO l'Hospitalet – Hospital Duran i Reynals                                 | Silvia Vazquez             |
| Instituto Valenciano de Oncologia IVO                                       | Joaquin Gavila Gregori     |
| <b>United Kingdom</b>                                                       |                            |
| Nottingham University Hospitals City Campus                                 | Srinivisan Madhusudan      |
| Royal Surrey County Hospital                                                | Timothy Crook              |
| Queen Mary University of London                                             | Peter Schmid               |
| Western General Hospital                                                    | Peter Hall                 |
| University College London Hospitals                                         | Rebecca Roylance           |
| <b>United States</b>                                                        |                            |
| Miami Cancer Institute                                                      | Grace Wang                 |
| Dana-Farber Cancer Institute and Beth Israel Deaconess Medical Center, Inc. | Ian Krop                   |
| Sylvester Comprehensive Cancer Center – Deerfield Beach                     | Reshma Mahtani             |
| Memorial Sloan Kettering Hospital                                           | Shanu Modi                 |
| Washington University                                                       | Haeseong Park              |
| Allegheny General Hospital                                                  | Jane Raymond               |
| Sharp Memorial Hospital                                                     | Charles Redfern            |
| MD Anderson Cancer Center                                                   | Rashmi Murthy              |
| The Oncology Institute of Hope and Innovation                               | Omkar Marathe              |
| Alaska Urological Institute dba Alaska Clinical Research Center             | Musaberk Goksel            |
| Accurate Clinical Research                                                  | Amir Abdul Rasheed         |
| Henry Ford Hospital                                                         | Haythem Yousif Ali         |
| North Shore Hematology Oncology Associates, PC                              | David Chu                  |
| University of Hawaii                                                        | Jami Fukui                 |
| UPMC Cancer Center                                                          | Adam Brufsky               |
| University of Cincinnati Medical Center                                     | Mahmoud Charif             |
| Sansum Clinic                                                               | Julie Taguchi              |
| Texas Oncology, P.A. – Longview                                             | Donald Richards            |
| Arizona Oncology Associates                                                 | Rachel Swart               |
| Texas Oncology, P.A.                                                        | Cynthia Osborne            |
| St Francis Hospital                                                         | Stephen Dyar               |

|                                             |                   |
|---------------------------------------------|-------------------|
| The Regents of the University of California | Sara Hurvitz      |
| Piedmont Cancer Institute                   | Vasileios Assikis |
| University of California San Francisco      | Hope Rugo         |
| Virginia Cancer Specialists, PC             | Neelima Denduluri |
| Ochsner Clinic Foundation                   | Marc Matrana      |

## Supplemental Methods

### Inclusion Criteria

- Men or women aged  $\geq 20$  years in Japan and Korea, aged  $\geq 18$  years in other countries
- Pathologically documented breast cancer
  - o Unresectable or metastatic
  - o Centrally confirmed human epidermal growth factor receptor 2–positive expression according to the American Society of Clinical Oncology/College of American Pathologists; archival tissue was accepted
  - o Resistant or refractory to ado-trastuzumab emtansine (T-DM1; discontinuation of T-DM1 for Part 2b)
  - o Presence of  $\geq 1$  measurable lesion (Response Evaluation Criteria in Solid Tumors v1.1)
- Left ventricular ejection fraction  $\geq 50\%$
- Eastern Cooperative Oncology Group performance status of 0 or 1
- Absolute neutrophil count  $\geq 1.5 \times 10^9/L$
- Platelet count  $\geq 100 \times 10^9/L$
- Hemoglobin level  $\geq 9.0$  g/dL
- Creatinine clearance  $\geq 30$  mL/min
- Total bilirubin  $\leq 3 \times$  upper limit of normal (ULN) and aspartate aminotransferase/alanine aminotransferase  $\leq 5 \times$  ULN
- International normalized ratio and activated partial thromboplastin time  $\leq 1.5 \times$  ULN

### Exclusion Criteria

- Myocardial infarction  $\leq 6$  months before registration, symptomatic congestive heart failure, unstable angina, or serious cardiac arrhythmia
- Corrected QT interval prolongation to  $>470$  ms (women) or  $>450$  ms (men)
- History of (noninfectious) interstitial lung disease (ILD)/pneumonitis that required steroids, current ILD/pneumonitis, or suspected ILD/pneumonitis that cannot be ruled out by imaging at screening
- Brain metastases that are untreated, symptomatic, or require therapy to control symptoms
- Clinically significant corneal disease
- Prior treatment with an antibody-drug conjugate consisting of an exatecan derivative that is a topoisomerase I inhibitor

- Unresolved toxicities from previous anticancer therapy
- Current treatment with cytochrome P450 3A4 strong inhibitors (washout period of  $\geq 3$  elimination half-lives of the inhibitor is required)

### **Safety Assessment**

The safety assessment included the analysis of treatment-emergent AEs (TEAEs), serious adverse events (AEs), treatment-related AEs, treatment-related AEs leading to discontinuations, and AEs of special interest. Additional safety assessments included the analysis of elevated troponin levels, physical examination findings, vital sign measurements, standard clinical laboratory parameters, electrocardiogram parameters, echocardiogram/multigated acquisition scan findings, and ophthalmologic findings. Left ventricular ejection fraction (LVEF) was measured by echocardiogram or multigated acquisition scans every 4 cycles. Furthermore, patients were screened for the development of antidrug antibodies during treatment with T-DXd.

### **Interstitial Lung Disease**

Potential cases of ILD were reviewed by an international, independent, multidisciplinary ILD adjudication committee that was established to review all cases of potential ILD reported in T-DXd studies on an ongoing basis. The committee adjudicates any reported cases that are part of the ILD standardized Medical Dictionary for Regulatory Activities 4.2 preferred terms and the 2 preferred terms respiratory failure and acute respiratory failure.

ILD was managed per-protocol with dose interruptions, reductions or discontinuation, corticosteroids, and supportive care. A summary of ILD management (implemented as of November 2017) is included below. Please see attached protocol for further details and note that these guidelines were used during the DESTINY-Breast01; additional recommendations can be found in Supplemental Table S6.

ILD/pneumonitis should be ruled out if a patient develops an acute onset of new or worsening pulmonary or other related signs/symptoms such as dyspnea, cough or fever. If the AE is suspected to be ILD/pneumonitis, treatment with study drug should be interrupted pending further evaluations. Evaluations should include high-resolution CT, pulmonologist consultation, pulmonary function tests and SpO<sub>2</sub>, arterial blood gases if clinically indicated. Other tests could be considered, as needed. As soon as

ILD/pneumonitis is suspected, treatment with study drug should be interrupted pending further evaluations and corticosteroid treatment should be started promptly as per clinical treatment guidelines. (see Kubo K, et al 2013 for guidance<sup>1</sup>) If the AE is confirmed to be grade 1 ILD/pneumonitis, T-DXd can be restarted only if the event is fully resolved; if resolved in  $\leq 28$  days from day of onset, maintain dose but if resolved in  $> 28$  days from day of onset, reduce dose 1 level. For grade 2, 3, or 4 events, permanently discontinue study treatment.



## Supplementary Tables and Figures

**Supplementary Table S1. Patient Demographics and Baseline Characteristics for Both Parts 1 and 2**

| <b>Demographic Variable</b>                            | <b>Patients<br/>N = 253</b> |
|--------------------------------------------------------|-----------------------------|
| Age, median (range), years <sup>a</sup>                | 56.0 (28.0-96.0)            |
| ≥65 years, n (%)                                       | 64 (25.3)                   |
| Female, n (%)                                          | 253 (100)                   |
| Race, n (%)                                            |                             |
| Asian                                                  | 104 (41.1)                  |
| White                                                  | 132 (52.2)                  |
| Other                                                  | 12 (4.7)                    |
| Missing                                                | 5 (2.0)                     |
| Region, n (%)                                          |                             |
| Europe                                                 | 80 (31.6)                   |
| Asia                                                   | 96 (37.9)                   |
| North America                                          | 77 (30.4)                   |
| ECOG performance status, n (%)                         |                             |
| 0                                                      | 146 (57.7)                  |
| 1                                                      | 106 (41.9)                  |
| 2                                                      | 1 (0.4)                     |
| Hormone receptor status, n (%)                         |                             |
| Positive                                               | 127 (50.2)                  |
| Negative                                               | 122 (48.2)                  |
| Unknown                                                | 4 (1.6)                     |
| HER2 expression, n (%) <sup>b</sup>                    |                             |
| IHC3+                                                  | 213 (84.2)                  |
| IHC1+/2+, ISH+                                         | 38 (15.0)                   |
| Missing <sup>c</sup>                                   | 2 (0.8)                     |
| Sum of diameters of target lesions, median (range), cm | 5.40 (1.1-24.5)             |

|                                                                                |            |
|--------------------------------------------------------------------------------|------------|
| No. of prior cancer therapy regimens in the metastatic setting, median (range) | 6 (2-27)   |
| Prior cancer systemic therapy, n (%)                                           |            |
| Trastuzumab                                                                    | 253 (100)  |
| T-DM1                                                                          | 253 (100)  |
| Pertuzumab                                                                     | 175 (69.2) |
| Other anti-HER2 therapies                                                      | 129 (51.0) |
| Hormone therapy                                                                | 119 (47.0) |
| Other systemic therapy                                                         | 252 (99.6) |
| Best response to T-DM1 therapy, n (%)                                          |            |
| Complete response/partial response/ stable disease                             | 110 (43.5) |
| Progressive disease                                                            | 99 (39.1)  |
| Not evaluable                                                                  | 44 (17.4)  |

ECOG, Eastern Cooperative Oncology Group; HER2, human epidermal growth factor receptor 2; IHC, immunohistochemistry; ISH, in situ hybridization; T-DM1, ado-trastuzumab emtansine; T-DXd, [fam-] trastuzumab deruxtecan.

<sup>a</sup> Median age at informed consent.

<sup>b</sup> HER2 expression was centrally confirmed using archival tissue.

<sup>c</sup> One patient sample was IHC 2+, ISH equivocal. One patient had a sample from June 2018 that was IHC 2+ and ISH not evaluable but was enrolled based on a central laboratory IHC 3+ sample from September 2017.

**Supplementary Table S2. Efficacy by Independent Central Review in Patients in Part 1**

|                           | <b>6.4 mg/kg<br/>(N = 48)</b>      | <b>7.4 mg/kg<br/>(N = 21)</b>       |
|---------------------------|------------------------------------|-------------------------------------|
| ORR (CR + PR), n (%)      | 33 (68.8)<br>(95% CI, 53.8%-81.3%) | 18 (85.7)<br>(95% CI, 63.7 %-97.0%) |
| CR                        | 2 (4.2)                            | 1 (4.8)                             |
| PR                        | 31 (64.6)                          | 17 (81.0)                           |
| SD                        | 14 (29.2)                          | 3 (14.3)                            |
| PD                        | 0                                  | 0                                   |
| Not evaluable             | 1 (2.1)                            | 0                                   |
| DOR, median, months       | NE<br>(95% CI, 8.3-NE)             | 6.0<br>(95% CI, 4.8-12.0)           |
| Events                    | 9 (27.3)                           | 10 (55.6)                           |
| Censored                  | 24 (72.7)                          | 8 (44.4)                            |
| PFS, median, months       | NE<br>(95% CI, 14.6-NE)            | 9.5<br>(95% CI, 7.4-NE)             |
| Events                    | 13 (27.1)                          | 11 (52.4)                           |
| Censored                  | 35 (72.9)                          | 10 (47.6)                           |
| DCR (CR + PR + SD), n (%) | 47 (97.9)<br>(95% CI, 88.9%-99.9%) | 21 (100)<br>(95% CI, 83.9%-100%)    |

CI, confidence interval; CR, complete response; DCR, disease control rate; DOR, duration of response; NE, not estimable; ORR, objective response rate; PD, progressive disease; PFS, progression-free survival; PR, partial response; SD, stable disease.

**Supplementary Table S3. Overall Safety of T-DXd in Patients Treated at the RP2D (5.4 mg/kg)**

| Type of Adverse Event, n (%) <sup>a</sup>           | Patients<br>(N = 184) |
|-----------------------------------------------------|-----------------------|
| TEAEs                                               | 183 (99.5)            |
| Drug-related TEAEs                                  | 183 (99.5)            |
| TEAEs grade ≥3                                      | 105 (57.1)            |
| Drug-related TEAEs grade ≥3                         | 89 (48.4)             |
| Serious TEAEs                                       | 42 (22.8)             |
| Drug-related serious TEAEs                          | 23 (12.5)             |
| TEAEs leading to T-DXd discontinuation              | 28 (15.2)             |
| Drug-related TEAEs leading to T-DXd discontinuation | 27 (14.7)             |
| TEAEs leading to dose reduction                     | 43 (23.4)             |
| Drug-related TEAEs leading to dose reduction        | 40 (21.7)             |
| TEAEs leading to dose interruption                  | 65 (35.3)             |
| Drug-related TEAEs leading to dose interruption     | 53 (28.8)             |
| TEAEs leading to death                              | 9 (4.9)               |
| Drug-related TEAEs leading to death                 | 2 (1.1)               |

TEAE, treatment-emergent adverse event; T-DXd, [fam-] trastuzumab deruxtecan.

<sup>a</sup> TEAE relationship to study drug was determined by the treating investigator.

**Supplementary Table S4. Treatment-Emergent Adverse Events in  $\geq 10\%$  of All Enrolled Patients**

| Preferred Term <sup>a</sup>                   | Patients<br>(N = 253) |                |                |
|-----------------------------------------------|-----------------------|----------------|----------------|
|                                               | All Grades, n (%)     | Grade 3, n (%) | Grade 4, n (%) |
| Patients with any TEAE                        | 252 (99.6)            | 127 (50.2)     | 15 (5.9)       |
| Nausea                                        | 196 (77.5)            | 20 (7.9)       | 0              |
| Fatigue                                       | 126 (49.8)            | 25 (9.9)       | 0              |
| Alopecia                                      | 126 (49.8)            | 1 (0.4)        | 0              |
| Vomiting                                      | 112 (44.3)            | 10 (4.0)       | 0              |
| Decreased neutrophil count <sup>b</sup>       | 102 (40.3)            | 51 (20.2)      | 9 (3.6)        |
| Constipation                                  | 95 (37.5)             | 1 (0.4)        | 0              |
| Anemia <sup>c</sup>                           | 85 (33.6)             | 27 (10.7)      | 1 (0.4)        |
| Decreased appetite                            | 84 (33.2)             | 4 (1.6)        | 0              |
| Diarrhea                                      | 74 (29.2)             | 5 (2.0)        | 0              |
| Decreased white blood cell count <sup>d</sup> | 68 (26.9)             | 20 (7.9)       | 2 (0.8)        |
| Decreased platelet count <sup>e</sup>         | 63 (24.9)             | 13 (5.1)       | 3 (1.2)        |
| Headache                                      | 49 (19.4)             | 0              | 0              |
| Cough                                         | 48 (19.0)             | 0              | 0              |
| Stomatitis <sup>f</sup>                       | 45 (17.8)             | 2 (0.8)        | 0              |
| Interstitial lung disease (ILD) <sup>g</sup>  | 39 (15.4)             | 2 (0.8)        | 0              |
| Abdominal pain <sup>h</sup>                   | 38 (15.0)             | 2 (0.8)        | 0              |
| Increased aspartate aminotransferase          | 38 (15.0)             | 4 (1.6)        | 1 (0.4)        |
| Decreased lymphocyte count <sup>i</sup>       | 33 (13.0)             | 14 (5.5)       | 2 (0.8)        |
| Asthenia                                      | 33 (13.0)             | 4 (1.6)        | 0              |
| Pyrexia                                       | 32 (12.6)             | 0              | 0              |
| Dyspepsia                                     | 31 (12.3)             | 0              | 0              |

|                                    |           |          |         |
|------------------------------------|-----------|----------|---------|
| Increased alanine aminotransferase | 31 (12.3) | 4 (1.6)  | 1 (0.4) |
| Dry eye                            | 29 (11.5) | 0        | 1 (0.4) |
| Dyspnea                            | 29 (11.5) | 4 (1.6)  | 0       |
| Epistaxis                          | 28 (11.1) | 0        | 0       |
| Hypokalemia                        | 28 (11.1) | 10 (4.0) | 0       |

TEAE, treatment-emergent adverse event.

<sup>a</sup> As reported by the investigator.

<sup>b</sup> Includes preferred terms “neutrophil count decreased” and “neutropenia.”

<sup>c</sup> Includes preferred terms “hematocrit decreased”, “hemoglobin decreased,” “red blood cell count decreased,” and “anemia.”

<sup>d</sup> Includes preferred terms “white blood cell count decreased” and “leukopenia.”

<sup>e</sup> Includes preferred terms “platelet count decreased” and “thrombocytopenia.”

<sup>f</sup> Includes preferred terms “stomatitis”, “aphthous ulcer”, “mouth ulceration”, “oral mucosa erosion”, and “oral mucosal blistering.”

<sup>g</sup> Drug-related ILD as determined by the independent ILD Adjudication Committee; includes 5 grade 5 ILD events.

<sup>h</sup> Includes preferred terms “abdominal discomfort”, “abdominal pain”, “abdominal pain lower”, and “abdominal pain upper.”

<sup>i</sup> Includes preferred terms “lymphocyte count decreased” and “lymphopenia.”

**Supplementary Table S5. Treatment-Emergent Adverse Events in >10% of Patients Treated at the RP2D, Regardless of Causality**

|                                               | <b>Patients<br/>(N = 184)</b> |                       |                       |
|-----------------------------------------------|-------------------------------|-----------------------|-----------------------|
| <b>Preferred Term<sup>a</sup></b>             | <b>Any Grade, n (%)</b>       | <b>Grade 3, n (%)</b> | <b>Grade 4, n (%)</b> |
| Patients with any TEAE                        | 183 (99.5)                    | 89 (48.4)             | 7 (3.8)               |
| Nausea                                        | 143 (77.7)                    | 14 (7.6)              | 0                     |
| Fatigue                                       | 91 (49.5)                     | 11 (6.0)              | 0                     |
| Alopecia                                      | 89 (48.4)                     | 1 (0.5)               | 0                     |
| Vomiting                                      | 84 (45.7)                     | 8 (4.3)               | 0                     |
| Constipation                                  | 66 (35.9)                     | 1 (0.5)               | 0                     |
| Decreased neutrophil count <sup>b</sup>       | 64 (34.8)                     | 36 (19.6)             | 2 (1.1)               |
| Decreased appetite                            | 57 (31.0)                     | 3 (1.6)               | 0                     |
| Anemia <sup>c</sup>                           | 55 (29.9)                     | 15 (8.2)              | 1 (0.5)               |
| Diarrhea                                      | 54 (29.3)                     | 5 (2.7)               | 0                     |
| Decreased white blood cell count <sup>d</sup> | 39 (21.2)                     | 11 (6.0)              | 1 (0.5)               |
| Decreased platelet count <sup>e</sup>         | 39 (21.2)                     | 7 (3.8)               | 1 (0.5)               |
| Headache                                      | 36 (19.6)                     | 0                     | 0                     |
| Cough                                         | 35 (19.0)                     | 0                     | 0                     |
| Abdominal pain <sup>f</sup>                   | 31 (16.8)                     | 2 (1.1)               | 0                     |

|                                              |           |          |         |
|----------------------------------------------|-----------|----------|---------|
| Decreased lymphocyte count <sup>g</sup>      | 26 (14.1) | 11 (6.0) | 1 (0.5) |
| Dyspnea                                      | 27 (14.7) | 3 (1.6)  | 0       |
| Stomatitis <sup>h</sup>                      | 27 (14.7) | 2 (1.1)  | 0       |
| Aspartate aminotransferase increased         | 26 (14.1) | 2 (1.1)  | 0       |
| Asthenia                                     | 26 (14.1) | 2 (1.1)  | 0       |
| Dyspepsia                                    | 26 (14.1) | 0        | 0       |
| Interstitial lung disease (ILD) <sup>i</sup> | 25 (13.6) | 1 (0.5)  | 0       |
| Epistaxis                                    | 24 (13.0) | 0        | 0       |
| Dry eye                                      | 21 (11.4) | 0        | 1 (0.5) |
| Hypokalemia                                  | 21 (11.4) | 6 (3.3)  | 0       |
| Upper respiratory tract infection            | 20 (10.9) | 0        | 0       |

RP2D, recommended Part 2 dose; TEAE, treatment-emergent adverse event.

<sup>a</sup> As reported by the investigator.

<sup>b</sup> Includes preferred terms “neutrophil count decreased” and “neutropenia.”

<sup>c</sup> Includes preferred terms “hematocrit decreased”, “hemoglobin decreased,” “red blood cell count decreased,” and “anemia.”

<sup>d</sup> Includes preferred terms “white blood cell count decreased” and “leukopenia.”

<sup>e</sup> Includes preferred terms “platelet count decreased” and “thrombocytopenia.”



<sup>f</sup> Includes preferred terms “abdominal discomfort”, “abdominal pain”, “abdominal pain lower”, and “abdominal pain upper.”

<sup>g</sup> Includes preferred terms “lymphocyte count decreased” and “lymphopenia.”

<sup>h</sup> Includes preferred terms “stomatitis”, “aphthous ulcer”, “mouth ulceration”, “oral mucosa erosion”, and “oral mucosal blistering.”

<sup>i</sup> Determined by the independent ILD Adjudication Committee as ILD and related to T-DXd; all grade ILD includes 4 cases of grade 5 events.

**Supplementary Table S6. Recommended Guidelines for the Management of Trastuzumab Deruxtecan-Induced Interstitial Lung Disease**

|                          | <b>Grade 1</b>                                                                                                                                                                                                                                                                                                                                                                                                                                                                                                                                                                                                                                                                                                                                                                                                                                                                                                                                                                                                                                                                                                                                                                                                                                                                                                                                                                             | <b>Grade 2</b>                                                        | <b>Grade 3 or 4</b>                                                   |
|--------------------------|--------------------------------------------------------------------------------------------------------------------------------------------------------------------------------------------------------------------------------------------------------------------------------------------------------------------------------------------------------------------------------------------------------------------------------------------------------------------------------------------------------------------------------------------------------------------------------------------------------------------------------------------------------------------------------------------------------------------------------------------------------------------------------------------------------------------------------------------------------------------------------------------------------------------------------------------------------------------------------------------------------------------------------------------------------------------------------------------------------------------------------------------------------------------------------------------------------------------------------------------------------------------------------------------------------------------------------------------------------------------------------------------|-----------------------------------------------------------------------|-----------------------------------------------------------------------|
| <b>Work-up</b>           | <ul style="list-style-type: none"> <li>• If a patient develops radiographic changes potentially consistent with ILD/pneumonitis or develops an acute onset of new or worsening pulmonary or other related signs/symptoms such as dyspnea, cough or fever, rule out ILD/pneumonitis</li> <li>• Evaluations should include:               <ul style="list-style-type: none"> <li>– High resolution CT</li> <li>– Pulmonologist consultation (Infectious Disease consultation as clinically indicated)</li> <li>– Blood culture and CBC. Other blood tests could be considered as needed</li> <li>– Consider bronchoscopy and bronchoalveolar lavage if clinically indicated and feasible</li> <li>– Pulmonary function tests and pulse oximetry</li> <li>– Arterial blood gases if clinically indicated</li> <li>– One blood sample collection for PK analysis as soon as ILD/pneumonitis is suspected, if feasible</li> </ul> </li> <li>• If the AE is confirmed to have an etiology other than treatment-related ILD/pneumonitis, follow routine clinical practice</li> <li>• If another etiology for the AE cannot be identified and it could be related to trastuzumab deruxtecan, then follow the ILD/pneumonitis management guidance as outlined below</li> <li>• All events of ILD/pneumonitis, regardless of severity or seriousness, should be followed until resolution</li> </ul> |                                                                       |                                                                       |
| <b>Dose modification</b> | <ul style="list-style-type: none"> <li>• The administration of trastuzumab deruxtecan must be interrupted</li> <li>• Trastuzumab deruxtecan can be restarted only if the event is fully resolved:               <ul style="list-style-type: none"> <li>– If resolved in <math>\leq 28</math> days from day of onset, maintain dose.</li> <li>– If resolved in <math>&gt; 28</math> days from day of onset, reduce dose by 1 level</li> <li>– However, if the event Grade 1 ILD occurs beyond cycle day</li> </ul> </li> </ul>                                                                                                                                                                                                                                                                                                                                                                                                                                                                                                                                                                                                                                                                                                                                                                                                                                                              | Permanently discontinue patient from trastuzumab deruxtecan treatment | Permanently discontinue patient from trastuzumab deruxtecan treatment |

|                            |                                                                                                                                                                                                                                                                                                                                                                                                                                                                                                                                                                                                                                                            |                                                                                                                                                                                                                                                                                                                                                                                                                                                                                                                                                                                                                                                                                                                                                                 |                                                                                                                                                                                                                                                                                                                                                                                                                                                                                                                                                                                                                                                                |
|----------------------------|------------------------------------------------------------------------------------------------------------------------------------------------------------------------------------------------------------------------------------------------------------------------------------------------------------------------------------------------------------------------------------------------------------------------------------------------------------------------------------------------------------------------------------------------------------------------------------------------------------------------------------------------------------|-----------------------------------------------------------------------------------------------------------------------------------------------------------------------------------------------------------------------------------------------------------------------------------------------------------------------------------------------------------------------------------------------------------------------------------------------------------------------------------------------------------------------------------------------------------------------------------------------------------------------------------------------------------------------------------------------------------------------------------------------------------------|----------------------------------------------------------------------------------------------------------------------------------------------------------------------------------------------------------------------------------------------------------------------------------------------------------------------------------------------------------------------------------------------------------------------------------------------------------------------------------------------------------------------------------------------------------------------------------------------------------------------------------------------------------------|
|                            | 22 and has not resolved within 49 days from the last infusion, the drug should be discontinued                                                                                                                                                                                                                                                                                                                                                                                                                                                                                                                                                             |                                                                                                                                                                                                                                                                                                                                                                                                                                                                                                                                                                                                                                                                                                                                                                 |                                                                                                                                                                                                                                                                                                                                                                                                                                                                                                                                                                                                                                                                |
| <b>Toxicity management</b> | <ul style="list-style-type: none"> <li>• Monitor and closely follow-up in 2 to 7 days for onset of clinical symptoms and pulse oximetry</li> <li>• Consider follow-up imaging in 1-2 weeks (or as clinically indicated)</li> <li>• Consider starting systemic steroids (e.g. at least 0.5 mg/kg/day prednisone or equivalent) until improvement, followed by gradual taper over at least 4 weeks</li> <li>• If worsening of diagnostic observations despite initiation of corticosteroids, then follow grade 2 guidelines. (If the patient is asymptomatic, then they should still be considered as grade 1 even if steroid treatment is given)</li> </ul> | <ul style="list-style-type: none"> <li>• Promptly start systemic steroids (e.g., at least 1 mg/kg/day prednisone or equivalent) until clinical improvement, followed by gradual taper over at least 4 weeks.</li> <li>• Monitor symptoms closely</li> <li>• Re-image as clinically indicated</li> <li>• If worsening or no improvement in clinical or diagnostic observations in 5 days, <ul style="list-style-type: none"> <li>– Consider increasing dose of steroids (e.g., 2 mg/kg/day prednisone or equivalent) and administration may be switched to intravenous (e.g. methylprednisolone)</li> <li>– Re-consider additional work-up for alternative etiologies as described above</li> <li>– Escalate care as clinically indicated</li> </ul> </li> </ul> | <ul style="list-style-type: none"> <li>• Hospitalization required</li> <li>• Promptly initiate empiric high-dose methylprednisolone IV treatment (e.g., 500-1000 mg/day for 3 days), followed by at least 1.0 mg/kg/day of prednisone (or equivalent) until clinical improvement, followed by gradual taper over at least 4 weeks</li> <li>• Re-image as clinically indicated</li> <li>• If still no improvement within 3 to 5 days, <ul style="list-style-type: none"> <li>– Re-consider additional work-up for alternative etiologies as described above</li> <li>– Consider other immunosuppressants and/or treat per local practice</li> </ul> </li> </ul> |

## Supplementary Figure S1. Study Design

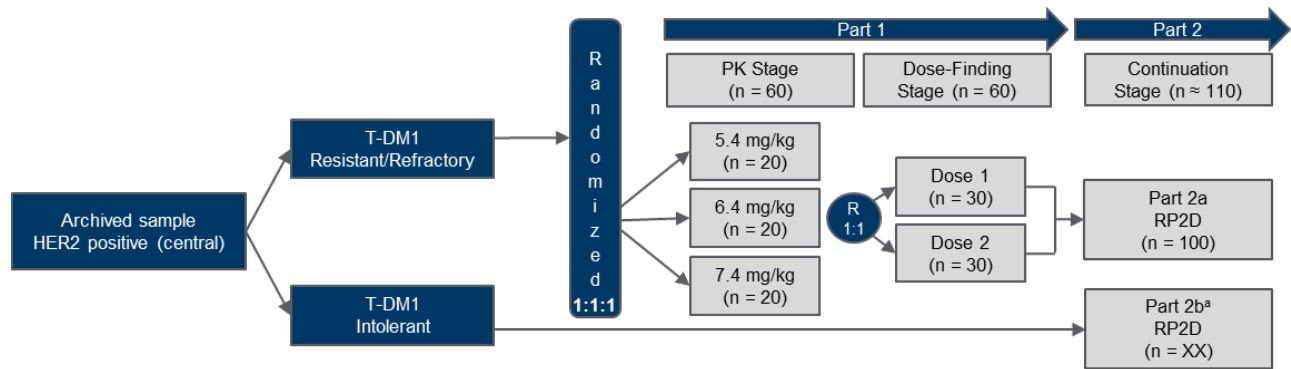

HER2, human epidermal growth factor receptor 2; PK, pharmacokinetics; RP2D, recommended Part 2 dose; T-DM1, ado-trastuzumab emtansine.

The n values shown in the figure are the planned enrollment numbers. Randomization for the dose-finding stage was based on pharmacokinetics.

<sup>a</sup> Approximately 10 to 15 patients were expected to enroll in Part 2b.

### Supplementary Figure S2. Overall survival

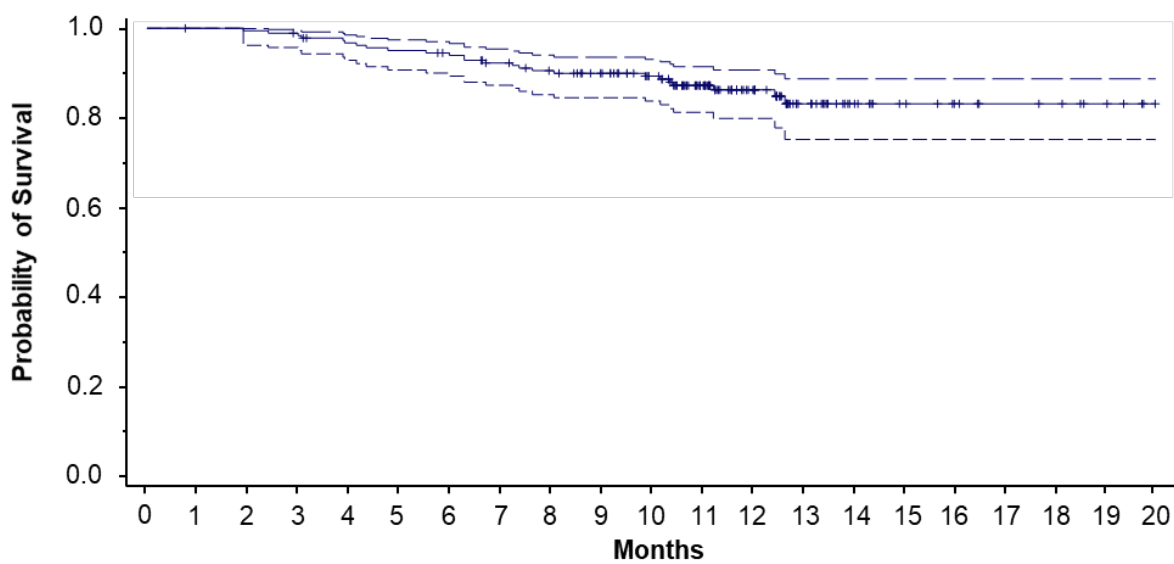

No. at risk: 184 183 182 179 174 171 167 161 155 147 133 101 66 36 21 16 12 9 8 4 0

As of the data cutoff, 25 of 184 patients (13.6%) had died and 159 were censored for the overall survival analysis.

Dashed lines represent 95% CIs.

## References

1. Kubo K, Azuma A, Kanazawa M, et al. Consensus statement for the diagnosis and treatment of drug-induced lung injuries. *Respir Investig*. 2013;51(4):260-277.
